# Supplementary material
Source: bioRxiv or medRxiv preprint supplement (http://medrxiv.stage.highwire.org/content/medrxiv/early/2023/05/16/2023.05.13.23289946/DC1/embed/media-1.pdf)
Supplement: Supplementary file [file media-1.pdf]

## **Supporting Information for**

### **Significant Production of Ozone from Germicidal UV Lights at 222 nm**

Zhe Peng,<sup>1,2</sup> Douglas A. Day,<sup>1,2</sup> Guy Symonds,<sup>1,2</sup> Olivia Jenks,<sup>1,2</sup> Harald Stark,<sup>1,2,3</sup> Anne V. Handschy,<sup>1,2</sup> Joost de Gouw,<sup>1,2</sup> and Jose L. Jimenez<sup>1,2</sup>

1: Dept. of Chemistry, University of Colorado, Boulder, CO, USA

2: Cooperative Institute for Research in Environmental Sciences (CIRES), University of Colorado, Boulder, CO, USA

3: Aerodyne Research, Billerica, MA, USA

### **Supporting Information Text Sections**

#### ***Section S1. Selection and Application of CBr<sub>4</sub> a tracer of GUV fluence rate in air***

A useful chemical tracer of GUV exposure should not react (or react slowly) with common atmospheric oxidants such as O<sub>3</sub>, OH, or the NO<sub>3</sub> radical at typical indoor air concentrations. O<sub>3</sub> and NO<sub>3</sub> typically react only with C=C double bonds, while OH can abstract hydrogens from most organic molecules.<sup>1</sup> A tracer should also have a high absorption cross section at the most common GUV wavelengths (222 and 254 nm), so that its decay is large enough and can be quantified over reasonable time scales despite instrumental noise. It should have high vapor pressure and low water solubility to reduce partitioning to room surfaces and tubing.<sup>2,3</sup> It should not be highly toxic, and it should be detectable with high sensitivity with existing instrumentation, so that its mixing ratio can be kept low to minimize any unwanted effects on chemistry or human exposure concerns. After comparing a few candidate species, we selected CBr<sub>4</sub> as a tracer. We show that it has relatively fast decay under 222 nm irradiation and can be detected by a commonly-available Proton-Transfer-Reaction Mass Spectrometer with high sensitivity.

A search for species with these properties that can serve as a GUV fluence rate tracer at both main GUV wavelengths in use (222 and 254 nm) identified three candidates, shown in the table below. Other species considered (including CF<sub>2</sub>Br<sub>2</sub>, CCl<sub>3</sub>Br, CF<sub>2</sub>I<sub>2</sub>, C<sub>2</sub>F<sub>5</sub>I, CF<sub>3</sub>I, OCS, and diacetyl) had too low absorption cross section ( $\sigma$ ) at one of the key GUV wavelengths. CBr<sub>4</sub> was selected due to having the highest  $\sigma$  (and thus the fastest photolysis rates), low reactivity with oxidants, and being detectable with the Vocus instrument with high sensitivity. This instrument is widely-available in air chemistry research laboratories. This molecule is an excellent tracer in particular for GUV222, as its absorption cross section is highest at that wavelength, and falls about an order of magnitude when 10 nm away on either side of the peak. The absorption cross sections of CBr<sub>4</sub>, O<sub>2</sub> and O<sub>3</sub> are shown in Fig. S6.

To quantify the sensitivity of the Vocus to CBr<sub>4</sub>, 20.10 mg CBr<sub>4</sub> was evaporated under clean nitrogen flow into the chamber (whose volume was measured by quantitatively injecting CO<sub>2</sub> and measuring the concentration). A teflon-coated fan was run for one minute following the

addition to ensure complete mixing. The concentration of CBr<sub>4</sub> in the chamber and measured ion counts per second (cps) for the CBr<sub>3</sub><sup>+</sup> ion were used to determine the sensitivity in cps ppb<sup>-1</sup>.

As CBr<sub>4</sub> also absorbs at 254 nm, it can cause interferences in the Thermo Scientific 49i O<sub>3</sub> Analyzer, which uses absorption at 254 nm to measure O<sub>3</sub>. We measured the apparent O<sub>3</sub> signal in the Thermo Scientific 49i O<sub>3</sub> Analyzer at several CBr<sub>4</sub> concentrations in the absence of O<sub>3</sub> in the chamber. Below 200 ppb CBr<sub>4</sub>, the interference of CBr<sub>4</sub> is approximately linear with its concentration (Fig. S11). The O<sub>3</sub> signal due to CBr<sub>4</sub> interference is ~0.007 ppb per ppb CBr<sub>4</sub> in this CBr<sub>4</sub> concentration range, in which most of the experiments in this study were (usually on the range 1-10 ppb). At very high CBr<sub>4</sub> concentration (~500 ppb), the relationship between the concentration and the O<sub>3</sub> interference is no longer linear.

During the O<sub>3</sub> generation rate quantification experiments, CBr<sub>4</sub> (Sigma-Aldrich) was added to the chamber after the O<sub>3</sub> quantification was done. This order was followed because CBr<sub>4</sub> photolysis produces Br radicals that can catalytically destroy O<sub>3</sub> in a similar way as catalytic destruction of stratospheric O<sub>3</sub> by Cl.<sup>4</sup> In the presence of CBr<sub>4</sub> and GUV irradiation (and hence Br atoms), a steady state for O<sub>3</sub> exists that is governed by Br concentration (and hence CBr<sub>4</sub> and GUV fluence rate). Fig. S12 shows the O<sub>3</sub>-CBr<sub>4</sub> relationship during a long CBr<sub>4</sub> decay experiment with the Far UV fixture (with filter). CBr<sub>4</sub> decay was relatively slow. Therefore, O<sub>3</sub> concentration responded to CBr<sub>4</sub> relatively rapidly and could be regarded as steady-state concentration.

*Table S1. key properties of potential GUV average fluence rate tracers. (\*): Lifetimes are estimated for typical indoor GUV intensities of  $2.61 \times 10^{12}$  and  $1.06 \times 10^{14}$  photons cm<sup>-2</sup> s<sup>-1</sup> at 222 and 254 nm, respectively, and for an OH concentration of  $1.5 \times 10^6$  molec. cm<sup>-3</sup>. (\*\*): no specific exposure limit, hazard information available at <https://pubchem.ncbi.nlm.nih.gov/>.*

| Species               | CBr <sub>4</sub> | CHBr <sub>3</sub> | BrCOC<br>OBr | CF <sub>2</sub> Br <sub>2</sub> | CCl <sub>3</sub> Br | CF <sub>2</sub> I <sub>2</sub> | C <sub>2</sub> F <sub>5</sub> I | CF <sub>3</sub> I |
|-----------------------|------------------|-------------------|--------------|---------------------------------|---------------------|--------------------------------|---------------------------------|-------------------|
| σ at 222 nm           | 2.85E-18         | 1.36E-18          | 2.00E-18     | 3.68E-19                        | 4.60E-19            | 1.12E-18                       | 4.73E-19                        | 4.26E-19          |
| σ at 254 nm           | 1.32E-17         | 5.78E-18          | 7.00E-18     | 2.44E-18                        | 4.80E-19            | 6.00E-19                       | 2.48E-20                        | 2.06E-20          |
| OH rate coeff.        | -                | 2.70E-13          | -            | -                               | -                   | -                              | -                               | -                 |
| GUV-222 lifetime* (h) | 8.0              | 18.4              | 15.2         | 43.5                            | 221.4               | 177.0                          | 4284                            | 5158              |
| GUV-254 lifetime* (h) | 0.9              | 1.9               | 1.3          | 7.1                             | 5.7                 | 2.3                            | 5.6                             | 6.2               |
| OH lifetime* (h)      | -                | 686               | -            | -                               | -                   | -                              | -                               | -                 |
| Exposure limit (ppb)  | 100              | 500               | **           | 10 <sup>5</sup>                 | **                  | **                             | **                              | **                |

## **Section S2. Selection of acetone as a tracer of Voc sensitivity**

A Vocus sensitivity tracer was useful for some experiments with weak lamps, e.g. the Naomi Wu (portable) and Eden Park (B) devices (Table 1), where the  $\text{CBr}_4$  photolytic decay was small ( $\sim 0.01 \text{ h}^{-1}$ ) and the Vocus sensitivity drift could be of a comparable magnitude.

Acetone was selected as a tracer of Vocus sensitivity because of the following properties. First, the Vocus instrument detects acetone with high sensitivity.<sup>5</sup> Besides, its absorption cross section drops by orders of magnitude between 195-200 nm and is 3-4 orders of magnitude lower than that of  $\text{CBr}_4$  (Fig. S6), leading to little photolysis by the GUV band centered at 222 nm. Moreover, it is unreactive with  $\text{O}_3$ , and its reaction with OH is negligible under the conditions in this study. After injection into the chamber, the acetone signal can serve to continuously quantify small variations in Vocus sensitivity, for the experiments where the GUV device has the optical filter that filters the 190 nm band.

### ***Section S3. Calibration of $\text{O}_3$ analyzers used for chamber and office experiments***

$\text{O}_3$  formation in the chamber was always measured with a Thermo Scientific 49i  $\text{O}_3$  Analyzer. That analyzer was calibrated using actinometry within the experimental chamber, where  $\sim 40$  ppb of  $\text{NO}_2$  was injected into the dry chamber, and the UVA lights are stepped through four discrete levels (between 10-100% of total UVA power). Equal amounts of NO and  $\text{O}_3$  are generated, which are monitored with the  $\text{O}_3$  analyzer and a Thermo Scientific 42i-TL  $\text{NO}-\text{NO}_2-\text{NO}_x$  Analyzer. The  $\text{NO}_x$  analyzer was calibrated using a NIST-certified ( $\pm 2\%$ ) calibration standard (gas cylinder with NO in  $\text{N}_2$ ) and Thermo Scientific Multi-Gas Calibrator (146i). We estimate that this method provides a calibration accuracy of  $\pm 5\%$  for the  $\text{O}_3$  analyzer.

$\text{O}_3$  decay rates and concentrations in the office experiments were always measured with a 2B Model 205 analyzer, which was cross-calibrated with the Thermo analyzer used in the chamber experiments, with its zero calibrated with zero air (resulting accuracy of  $\pm 7\%$ , and zero uncertainty of  $\pm 0.5$  ppb).

### ***Section S4. Data analysis and kinetic modeling for the office $\text{O}_3$ production experiment***

#### *Characterization Tests*

In characterization tests (without a GUV lamp), the ventilation rate was measured as  $0.52-0.61 \text{ hr}^{-1}$  ( $\tau$ : 1.6-1.9 h) using  $\text{CO}_2$  decay. For initial characterization of  $\text{O}_3$  decay,  $\sim 400-500$  ppb  $\text{O}_3$  were generated with an unfiltered low-pressure Hg lamp with partial emission at 185 nm (BHK 82-9304-03) (Fig. S3), together with  $\text{CO}_2$  injection. As expected, the decay of  $\text{O}_3$  generated by the Hg lamp was faster than  $\text{CO}_2$  decay (Fig. S4), because of other  $\text{O}_3$  losses than ventilation (dry deposition, reactions with VOC emitted indoors etc.). Subtracting the two rate coefficients yields an  $\text{O}_3$  deposition coefficient of  $0.76-1.1 \text{ h}^{-1}$  ( $\tau$ : 0.93-1.3 h), and the overall  $\text{O}_3$  decay rate as  $1.3-1.7 \text{ hr}^{-1}$  ( $\tau$ : 0.59-0.78 h).

Given the variability in these experiments, the  $\text{CO}_2$  and  $\text{O}_3$  decay rates were measured after each period in which the GUV lamp was turned on, as described in the main paper.

## *Modeling*

To quantify the O<sub>3</sub> production rate from the GUV lamp, all relevant parameters affecting O<sub>3</sub> concentration in the office were modeled in KinSim. The first-order ventilation rate, first order deposition rate coefficient (implicitly including gas and aerosol reactions), and the approximate mixing ratio of O<sub>3</sub> entering the room from outside the room had to be measured or estimated.

The ventilation rate was directly measured using CO<sub>2</sub> pulse injection experiments discussed in the main paper, and the deposition rate was estimated by subtracting the ventilation rate from the first-order overall O<sub>3</sub> loss rate coefficient (green fit lines in Fig. S9). From here, the effective value for the O<sub>3</sub> mixing in from outside the room was approximated through tuning of the model when the lamp was off (blue points in Fig. S9). Finally, across 5 of the 8 peaks the production rate was tuned individually until it matched with each peak, and then the average was used as a constant production rate (individual values shown in Fig. S9 and used as a metric of uncertainty). Peaks 3, 7, and 8 were excluded due to rapidly changing O<sub>3</sub> background levels. As it was found that the estimated O<sub>3</sub> deposition rate varied substantially for the different light cycles, it was assumed to be constant for the model and the average value was used as an input (and computing “outside” O<sub>3</sub>). This choice was made since, given the relative invariability of the ventilation rate and lack of activity in the room, it seemed unlikely that actual O<sub>3</sub> deposition rate coefficient would change all that much. More likely, the variability was more driven by a combination of uncertainty in changing ventilation rates and “outside” O<sub>3</sub> on timescales faster than these parameters could be quantified, as well as the uncertainties associated with fitting and subtracting decay and ventilation rates. Figure S9 displays all of these parameters in the first “variable deposition” scenario as well as the second “constant deposition scenario”. The O<sub>3</sub> production rate for the GUV lamp was only calculated for the second scenario.

As seen in Fig. S10, The O<sub>3</sub> production rate for the conference room is slightly lower than that of the chamber due to the size of the room (~32.9 vs. ~20.6 m<sup>3</sup>) and effective UV pathlength (~3.2 vs. ~4.5 m). However, the results are within error bars when these differences are taken into account. The effective path length is shorter in the conference room both because of the shorter length of the room (3.8 m), and the combination with the narrowness of the room and furniture obstructions, which we estimate to reduce effective pathlength by ~15%.

### ***Section S5. Evaluation of handheld electrochemical O<sub>3</sub> monitors***

Three low-cost (~\$100) handheld electrochemical O<sub>3</sub> monitor models were compared with our research-grade UV absorption Thermo Scientific Model 49i Ozone Analyzer. Table S2 lists all three monitors with their relevant information and specs. Two identical monitors were tested for the Shenzhen Dienmern model.

Table S2. Specifications for all low-cost O<sub>3</sub> monitors tested in the chamber instrument

| Company and cost                                          | Name, Model, and Principle of Operation                                                                    | Advertised Specifications                                                                                                                                                                                                                                                                                                                                                                                                                                                                                                                                                                                                                                         | Resolution of Monitor Display |
|-----------------------------------------------------------|------------------------------------------------------------------------------------------------------------|-------------------------------------------------------------------------------------------------------------------------------------------------------------------------------------------------------------------------------------------------------------------------------------------------------------------------------------------------------------------------------------------------------------------------------------------------------------------------------------------------------------------------------------------------------------------------------------------------------------------------------------------------------------------|-------------------------------|
| Shandong Renke Control Technology Co., Ltd.<br><br>\$114  | “Portable Accurate O <sub>3</sub> Sensor”<br><br>Model: RS-MG41-O3<br><br>Electrochemical sensor           | 0~10.00 ppm<br><br>Accuracy:<br>±6%FS(@5ppm,25°C,50% RH)<br><br>Zero drift: ≤±1ppm<br><br>Duplicate Value: ≤2%<br><br>From listing on Renke’s website:<br><a href="https://www.renkeer.com/product/portable-ozone-meter/">https://www.renkeer.com/product/portable-ozone-meter/</a>                                                                                                                                                                                                                                                                                                                                                                               | 0.01 ppm (10 ppb)             |
| Shenzhen Dienmern Testing Technology Co., Ltd<br><br>\$55 | “Portable O <sub>3</sub> handheld gas analyzer”<br><br>Model: DM509-O3 model<br><br>Electrochemical sensor | O <sub>3</sub> (0-5 ppm)<br><br>From listing on Alibaba.com:<br><br><a href="https://dienmern.en.alibaba.com/product/1600275994341-910743044/Portable-Ozone-Analyzer-Hing-accurate-O3-Ozone-sensor-Air-Detector-Intelligent-Sensor-Ozone-Meter-Air-Quality-Pollution-Monitor.html?spm=a2700.shop_index.111720.3.55b15bceN6NeQC">https://dienmern.en.alibaba.com/product/1600275994341-910743044/Portable-Ozone-Analyzer-Hing-accurate-O3-Ozone-sensor-Air-Detector-Intelligent-Sensor-Ozone-Meter-Air-Quality-Pollution-Monitor.html?spm=a2700.shop_index.111720.3.55b15bceN6NeQC</a>                                                                             | 0.001 ppm (1 ppb)             |
| Shenzhen YuanTe Technology Co., Ltd<br><br>\$815          | “Portable Gas Detector”<br><br>Model: SKY2000<br><br>Electrochemical sensor                                | 0-10 ppm<br><br>Accuracy: ≤±3% F.S.<br><br>Repeatability: ≤±1%<br><br>Linearity Error: ≤±1%<br><br>Zero Shift: ≤±1% (F.S./year)<br><br><a href="https://siafa.com.ar/media/src/sky2000-catalogue-with-datasheetam.pdf">https://siafa.com.ar/media/src/sky2000-catalogue-with-datasheetam.pdf</a><br><br><a href="https://www.ato.com/portable-o3-gas-detector?affiliate=shopping&amp;qclid=CjwKC_Aiwx_eiBhBGEiwA15gLN6lkKk3nanBn5ZAzfaL5ereQOHciQldUMcFdgNIEI_3Qk5t47it2RoCRVcQAvD_BwE">https://www.ato.com/portable-o3-gas-detector?affiliate=shopping&amp;qclid=CjwKC_Aiwx_eiBhBGEiwA15gLN6lkKk3nanBn5ZAzfaL5ereQOHciQldUMcFdgNIEI_3Qk5t47it2RoCRVcQAvD_BwE</a> | 0.01 ppm (10 ppb)             |

The set up for these monitors in the chamber can be seen in Fig. S13. O<sub>3</sub> was injected into the chamber with a commercial O<sub>3</sub> generator (BMT 802N) periodically, followed by mixing with a fan, in order to generate constant concentration O<sub>3</sub> “steps”. The Thermo O<sub>3</sub> concentrations were logged continuously and the concentrations of the hand-held O<sub>3</sub> monitors were manually read and recorded for each step. The results of this comparison can be seen in Figs. S14 and S15.

Performance is very poor at the relevant levels for typical indoor O<sub>3</sub> and the levels expected when GUV222 is applied at e.g. ACGIH limits (i.e. no response for O<sub>3</sub> <150–400 ppb). At higher levels > 200 ppb, the Shenzhen YuanTe monitor eventually quantifies O<sub>3</sub> with good accuracy, while the other two models continue to be low by a factor of ~8. The Shenzhen YuanTe monitor is also distinct from the other two as it is a factor of ~10 more expensive. According to the information that we could find (see Table S2), two of these monitors appear to have failed their accuracy and/or zero drift specifications. For the other one, the only specs that we found were the measurement range and statements that it has high accuracy. To the best of our current knowledge, the lowest cost monitors capable of accurate O<sub>3</sub> measurements at single-digit or tens of ppb-level concentrations are based on UV absorption, and cost at least \$6000.

### Section S6. Comparison of the health effects (premature death) for O<sub>3</sub> and fine PM.

The mortality due to long-term exposure to O<sub>3</sub> (per unit mass of O<sub>3</sub>) can be estimated from the literature. Turner et al. (2016)<sup>6</sup> is considered the best study to date on this topic (J. Balmes, UCSF, pers. comm., 2023). This study reports an increase in all-cause mortality of 2% per 10 ppb increase in O<sub>3</sub>. 10 ppb are equivalent to 19.7 µg m<sup>-3</sup> at 1 atm and 298 K. Thus, we can estimate the risk per unit mass of O<sub>3</sub> as 2% / 19.7 = 0.10% per µg m<sup>-3</sup>.

For comparison, the mortality due to long-term exposure to PM<sub>2.5</sub> can be estimated from Figure 2a of Weichenthal et al. (2022)<sup>7</sup>. For their updated exposure function, the increased relative risk of mortality per unit increase in PM<sub>2.5</sub> (i.e. the slope of the curve) is highest between 2.5-4 µg m<sup>-3</sup>, at about 3.2% per µg m<sup>-3</sup>. At concentrations around the US PM<sub>2.5</sub> average of ~7 µg m<sup>-3</sup>, this value is 1% per µg m<sup>-3</sup> for their updated function, and 0.95% per µg m<sup>-3</sup> for the prior literature function.

Thus depending on the estimate used for PM<sub>2.5</sub> risk, the all-cause mortality risk of PM<sub>2.5</sub> is 9.5-32 times larger than for O<sub>3</sub>.

### References:

- (1) Atkinson, R.; Arey, J. Atmospheric Degradation of Volatile Organic Compounds. *Chem. Rev.* **2003**, *103* (12), 4605–4638.
- (2) Pagonis, D.; Price, D. J.; Algrim, L. B.; Day, D. A.; Handschy, A. V.; Stark, H.; Miller, S. L.; de Gouw, J.; Jimenez, J. L.; Ziemann, P. J. Time-Resolved Measurements of Indoor Chemical Emissions, Deposition, and Reactions in a University Art Museum. *Environ. Sci. Technol.* **2019**, *53* (9), 4794–4802.
- (3) Liu, X.; Deming, B.; Pagonis, D.; Day, D. A.; Palm, B. B.; Talukdar, R.; Roberts, J. M.; Veres, P. R.; Krechmer, J. E.; Thornton, J. A.; de Gouw, J. A.; Ziemann, P. J.; Jimenez, J. L. Effects of Gas–wall Interactions on Measurements of Semivolatile Compounds and Small Polar Molecules. *Atmos. Meas. Tech.* **2019**, *12* (6), 3137–3149.
- (4) Seinfeld, J. H.; Pandis, S. N. *Atmospheric Chemistry and Physics: From Air Pollution to Climate Change*; John Wiley & Sons, Inc.: Hoboken, NJ, USA, 2006; p 1232.
- (5) Pagonis, D.; Sekimoto, K.; de Gouw, J. A Library of Proton-Transfer Reactions of H<sub>3</sub>O<sup>+</sup> Ions Used for Trace Gas Detection. *J. Am. Soc. Mass Spectrom.* **2019**, *30* (7), 1330–1335.

- (6) Turner, M. C.; Jerrett, M.; Pope, C. A., 3rd; Krewski, D.; Gapstur, S. M.; Diver, W. R.; Beckerman, B. S.; Marshall, J. D.; Su, J.; Crouse, D. L.; Burnett, R. T. Long-Term Ozone Exposure and Mortality in a Large Prospective Study. *Am. J. Respir. Crit. Care Med.* **2016**, *193* (10), 1134–1142.
- (7) Weichenthal, S.; Pinault, L.; Christidis, T.; Burnett, R. T.; Brook, J. R.; Chu, Y.; Crouse, D. L.; Erickson, A. C.; Hystad, P.; Li, C.; Martin, R. V.; Meng, J.; Pappin, A. J.; Tjepkema, M.; van Donkelaar, A.; Weagle, C. L.; Brauer, M. How Low Can You Go? Air Pollution Affects Mortality at Very Low Levels. *Sci Adv* **2022**, *8* (39), eabo3381.
- (8) Claus, H. Ozone Generation by Ultraviolet Lamps†. *Photochem. Photobiol.* **2021**, *97* (3), 471–476.
- (9) Yoshino, K.; Esmond, J. R.; Cheung, A. S.-C.; Freeman, D. E.; Parkinson, W. H. High Resolution Absorption Cross Sections in the Transmission Window Region of the Schumann-Runge Bands and Herzberg Continuum of O<sub>2</sub>. *Planet. Space Sci.* **1992**, *40* (2), 185–192.
- (10) Burkholder, J. B.; Sander, S. P.; Abbatt, J. P. D.; Barker, J. R.; Cappa, C.; Crouse, J. D.; Dibble, T. S.; Huie, R. E.; Kolb, C. E.; Kurylo, M. J.; Others. *Chemical Kinetics and Photochemical Data for Use in Atmospheric Studies; Evaluation Number 19*; Pasadena, CA: Jet Propulsion Laboratory, National Aeronautics and Space ..., 2020. <https://trs.jpl.nasa.gov/handle/2014/49199>.

## Supporting Information Figures

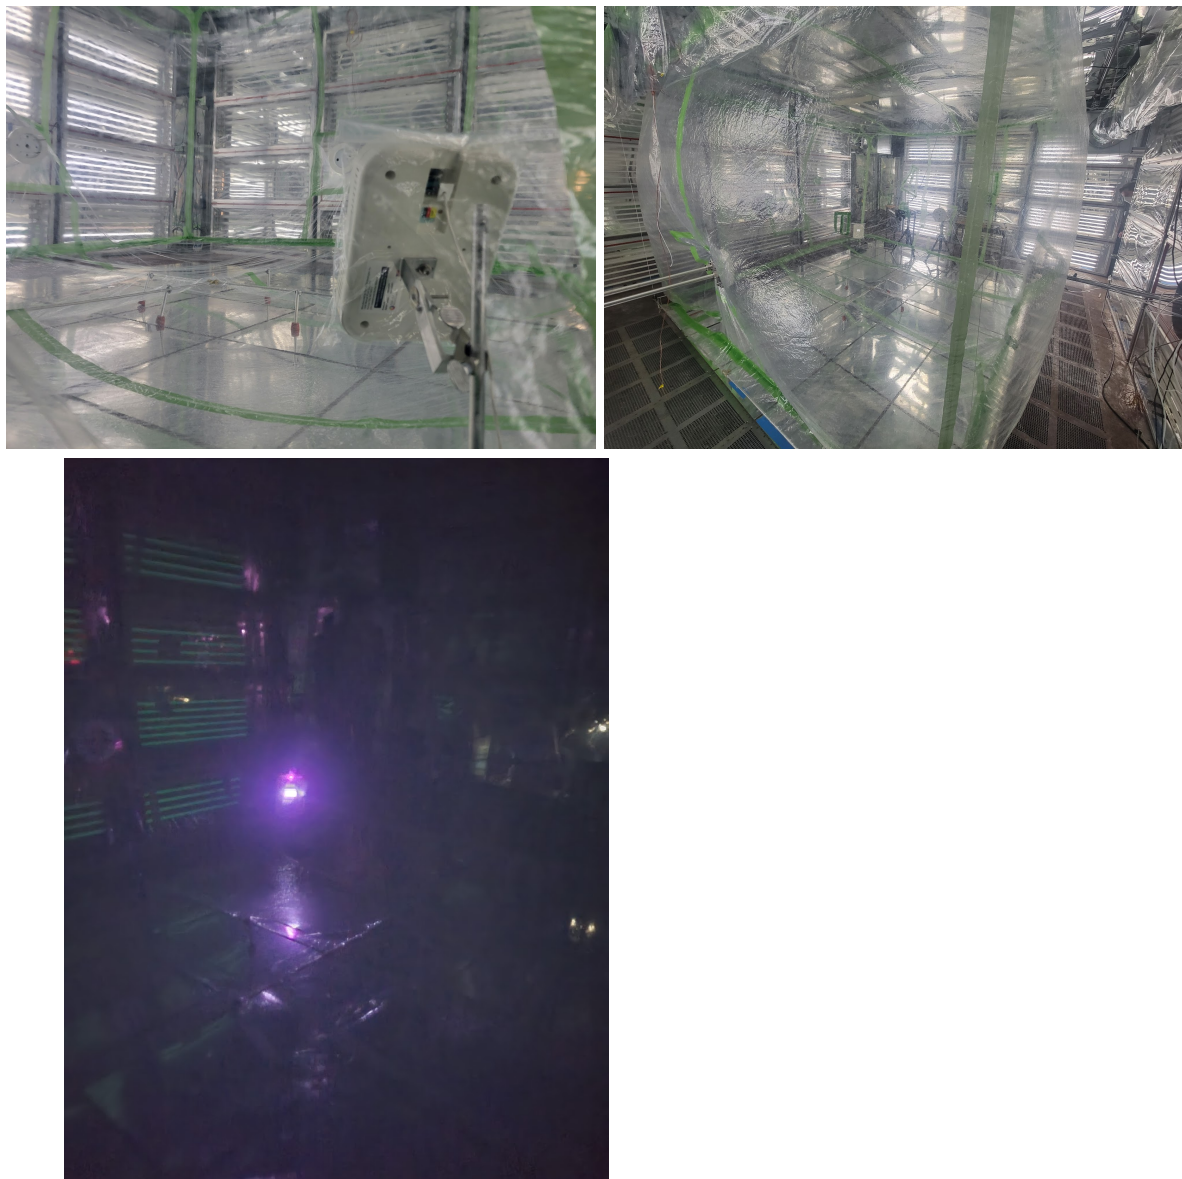

*Figure S1. Pictures showing the FarUV GUV222 lamp mounted inside the Teflon chamber. Other lamps were tested in the same physical configuration. All tests were performed with the visible lights off, as in the last picture.*



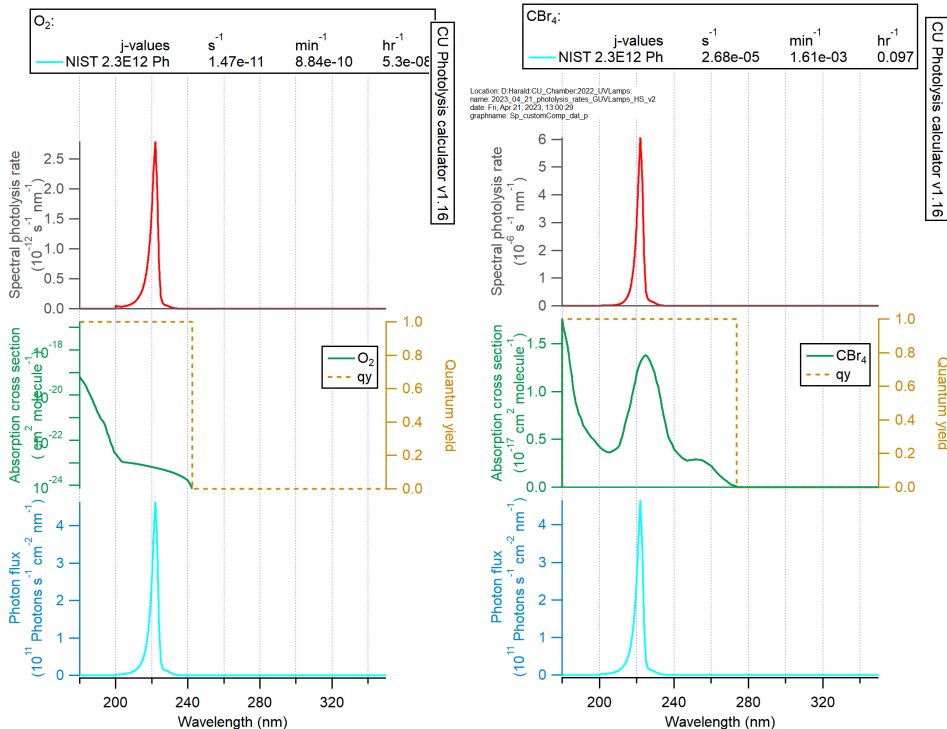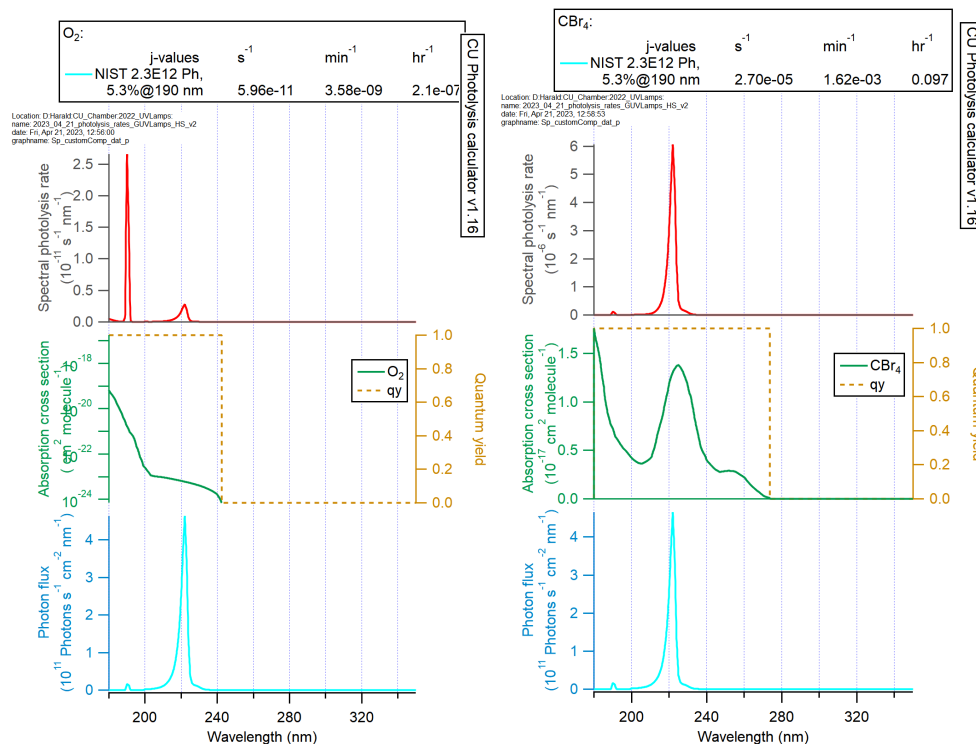

Figure S2. (Top) photolysis spectra and rates from O<sub>2</sub> (left) and CBr<sub>4</sub> (right) for NIST-measured Ushio lamp spectrum. (Bottom) results for the same lamp with an additional peak of 5.3% of the peak intensity manually added centered at 190 nm, estimated from Claus (2021).<sup>8</sup> These results were generated with the CU-Boulder photolysis calculator.

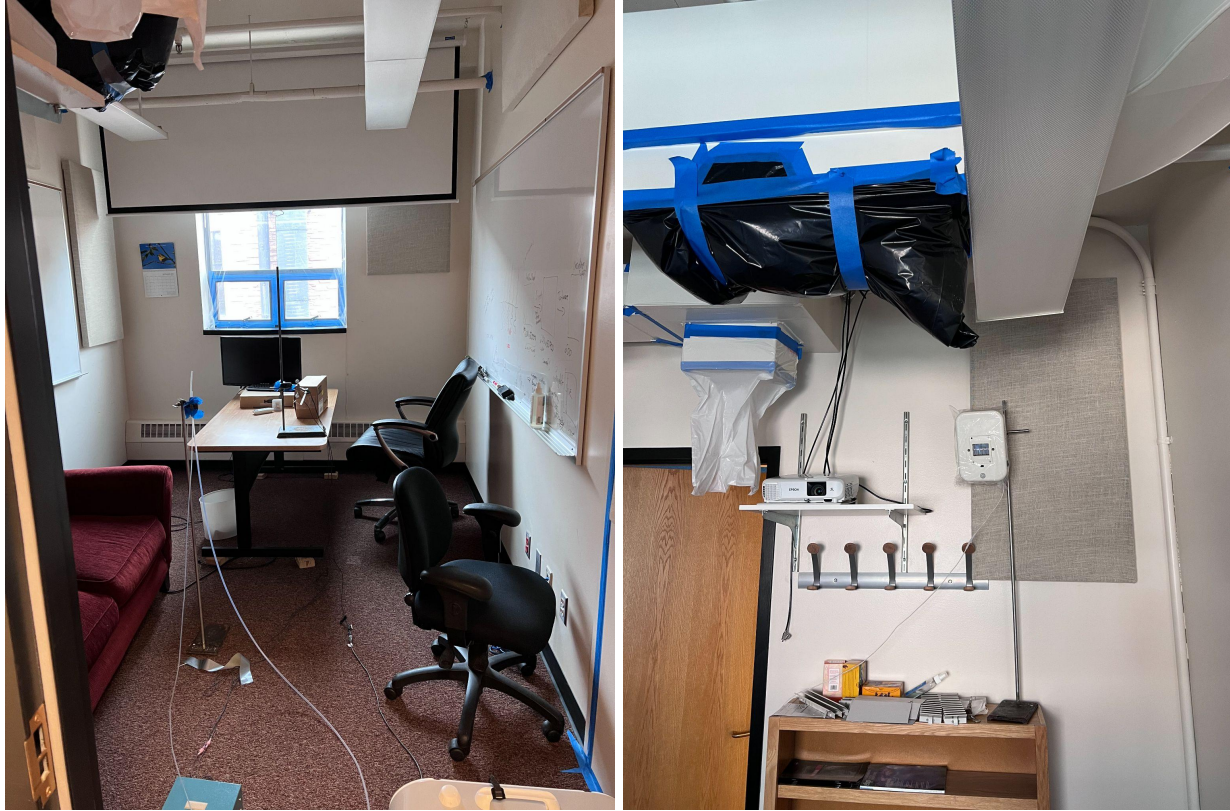

Figure S3. Experimental setup in the test office. The  $O_3$  sampling tube and  $CO_2$  injection tube were placed in the middle of the room on a ring stand (left). The GUV lamp was placed high in the room against the West wall of the room (right). The path of the light was interrupted by the furniture and walls, and the effective pathlength in the main paper was estimated to account for those obstructions.

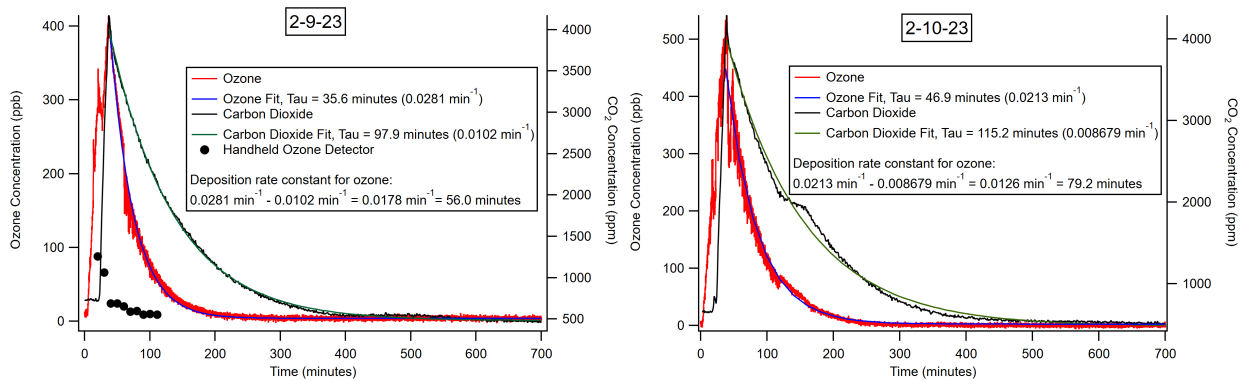

Figure S4. Decays of  $O_3$  and  $CO_2$  in the office experiments, along with the approximate decay first-order rate coefficients for 2 experiments on 2 different days. Measurements from a handheld low-cost  $O_3$  detector are also shown, which underestimated the  $O_3$  concentration by about an order-of-magnitude (see Section S5).

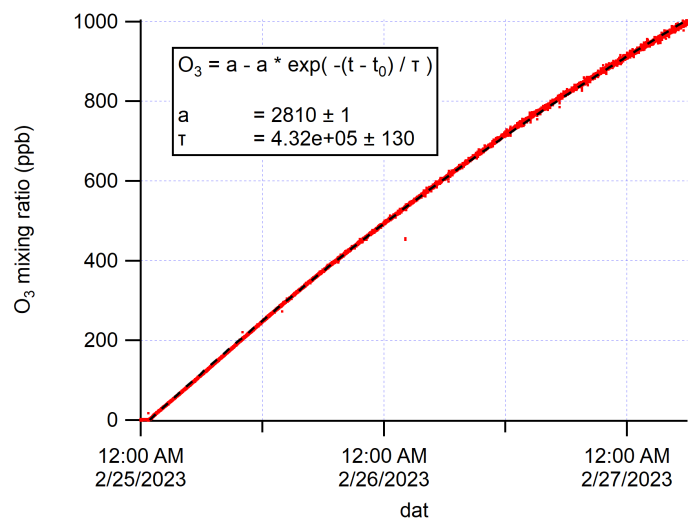

Figure S5.  $O_3$  concentration vs. time in the chamber when the custom lamp with an Ushio B1 module was turned on for an extended period.

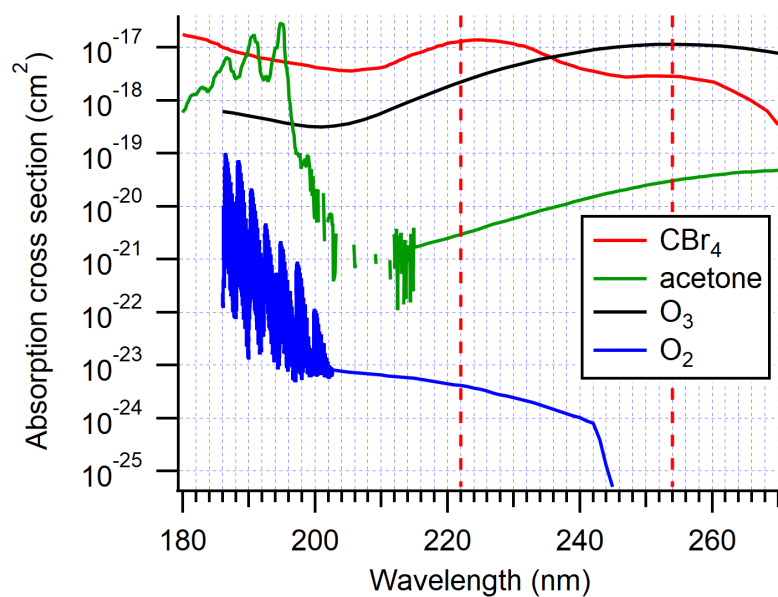

Figure S6. Absorption cross sections vs. UV wavelength for  $O_2$ ,  $O_3$ , acetone and  $CBr_4$ .<sup>9,10</sup>

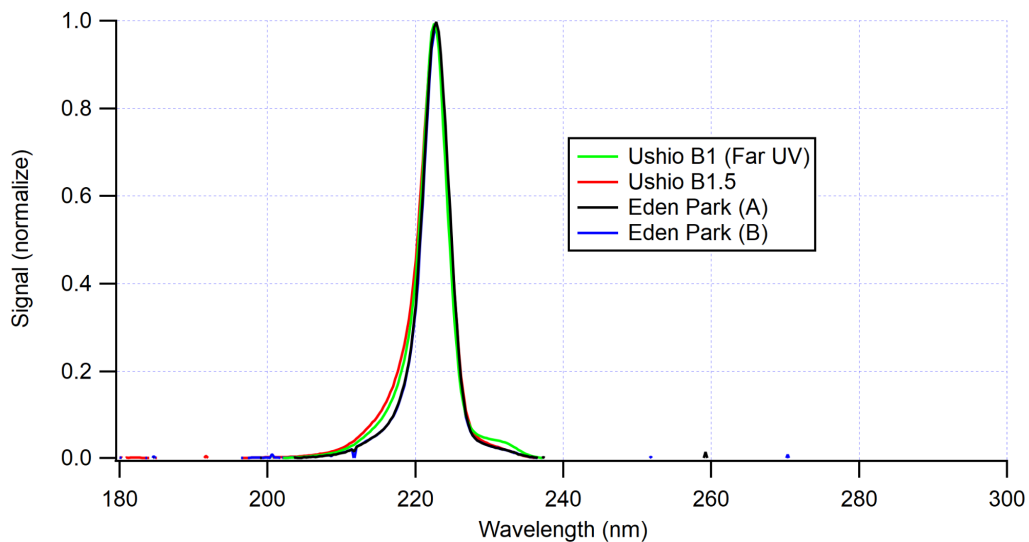

Figure S7. Measured emission spectra of the Far UV (Ushio B1), Ushio B1.5, and Eden Park (A) and (B) lamps. All spectra were measured with their original filters in place.

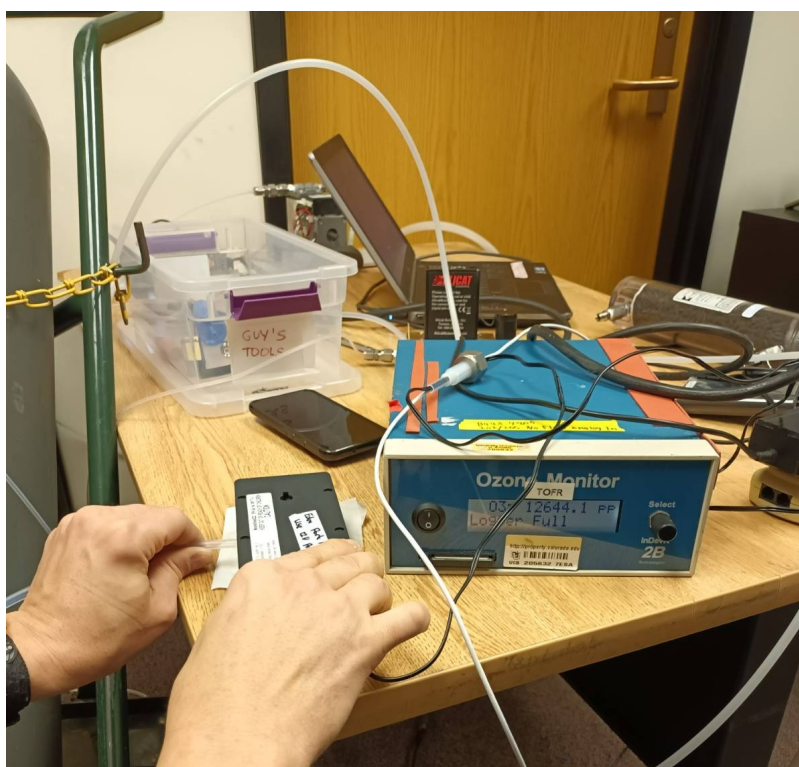

Figure S8. Picture of the setup for  $O_3$  measurement just outside the electronics compartment of the Eden Park (A) device (black box held with right hand). The light emission surface points down into the table. The 2B  $O_3$  analyzer displays a measured  $O_3$  concentration of 12.6 ppm. Similar readings were observed for a period of several minutes.

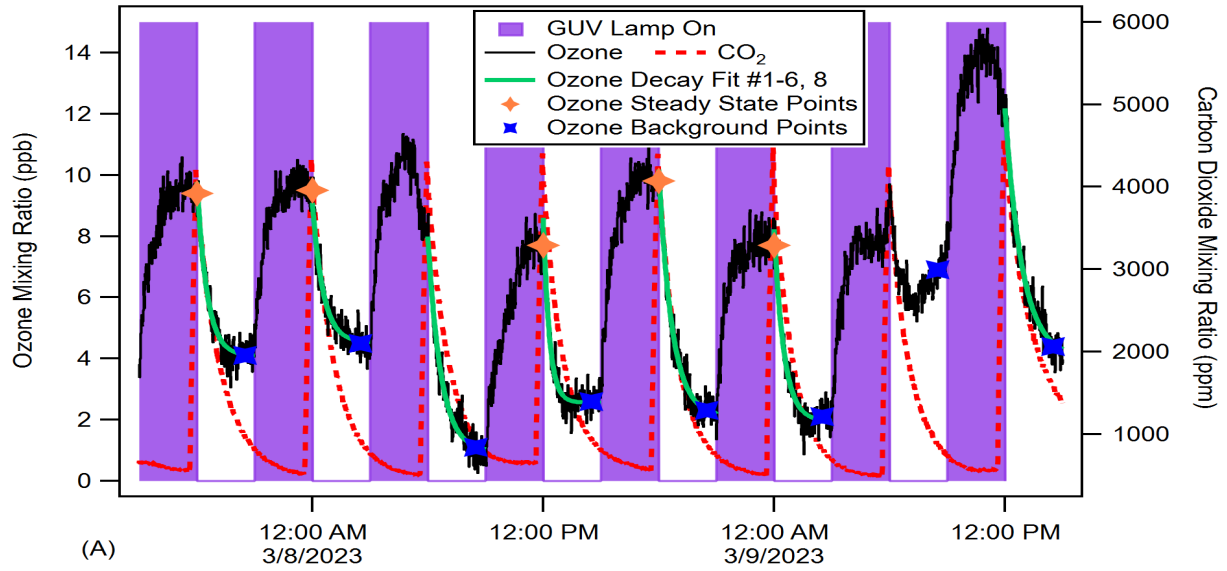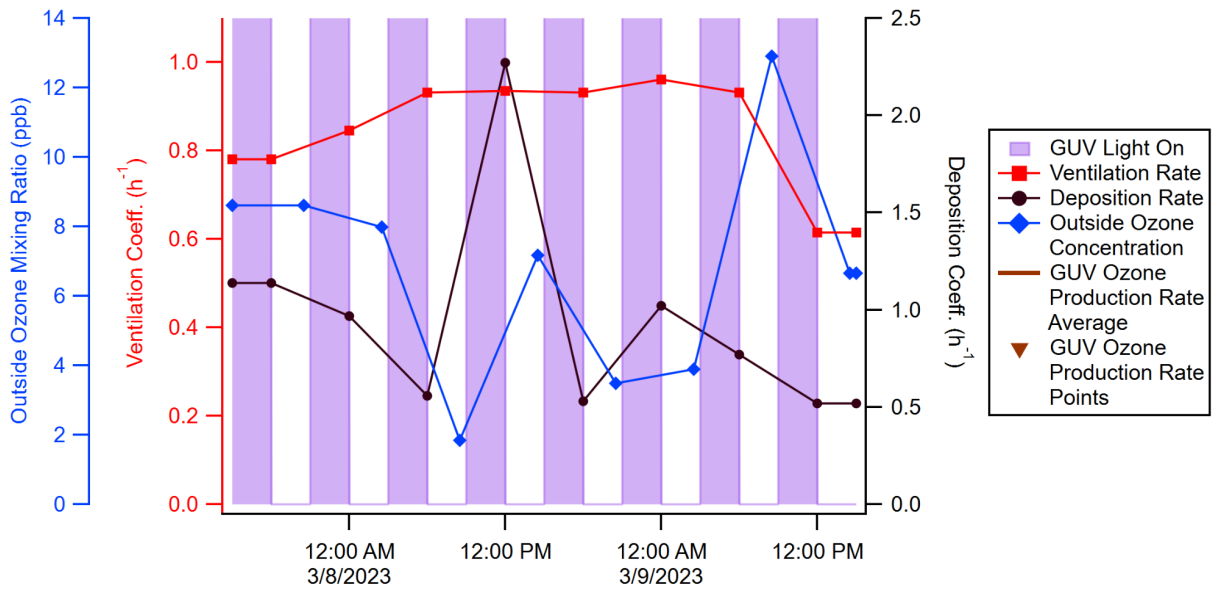

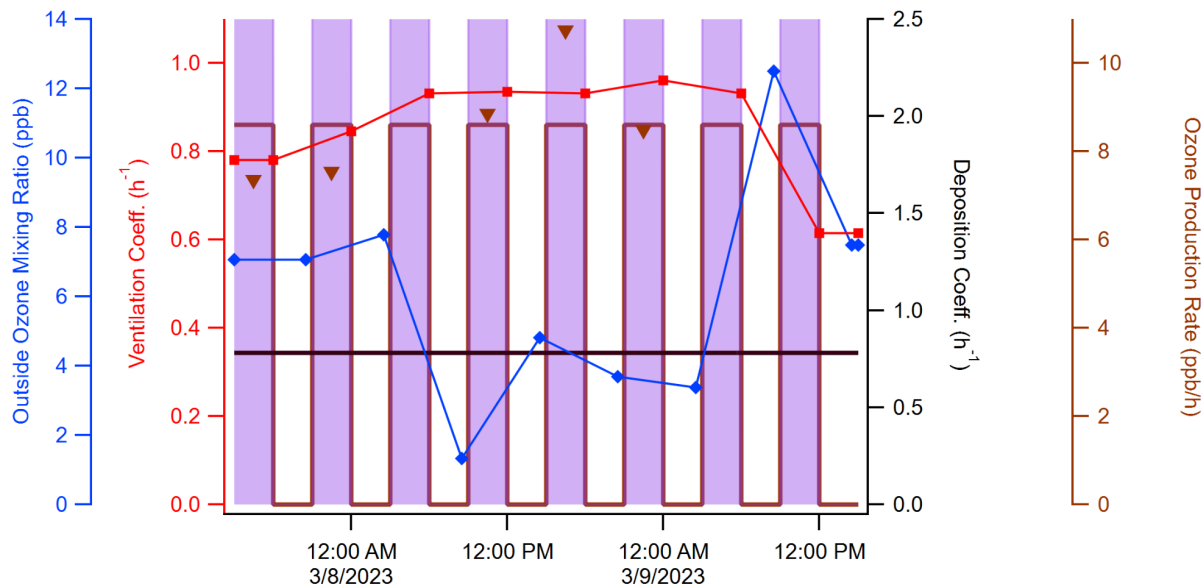

Figure S9. (Top):  $O_3$  concentration in the office as the GUV lamp was cycled on and off in 3-hour increments over 8 total cycles with corresponding  $CO_2$  pulses to measure ventilation rate. (Middle and Bottom): relevant parameters for modeling  $O_3$  concentrations in the office experiments with the KinSim model, plotted vs. time. The middle graph shows the scenario where deposition varies over time. The bottom graph shows the scenario where deposition is assumed to be constant.

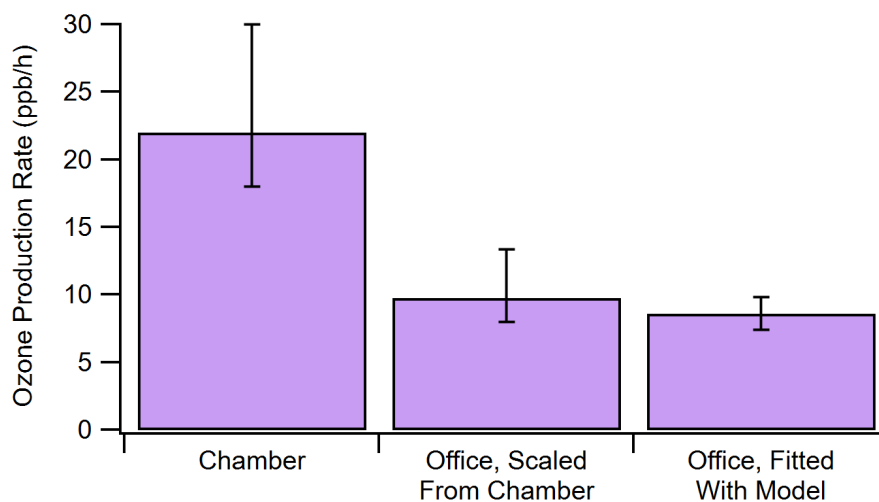

Figure S10. The production rates of  $O_3$  compared between the conference room and chamber along with the value expected for the conference room by scaling the chamber results with the relative room volume and effective GUV light pathlengths.

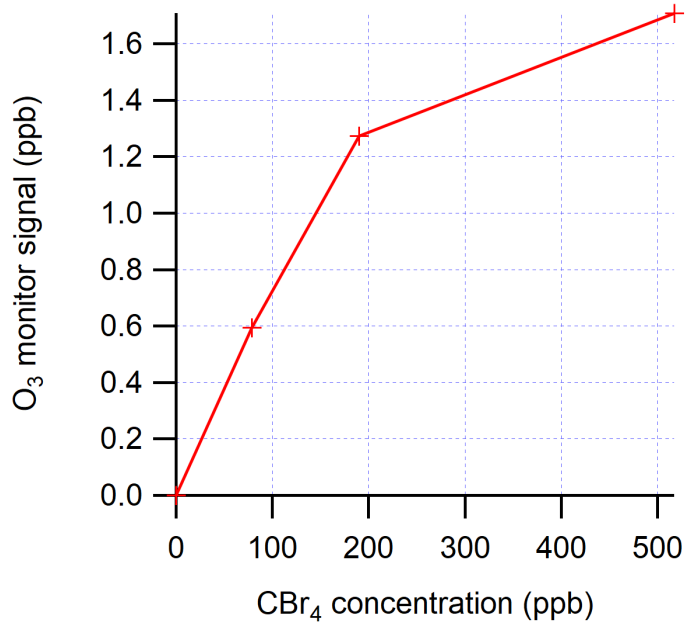

Figure S11. Apparent O<sub>3</sub> signal measured in the chamber due to CBr<sub>4</sub> interference at different CBr<sub>4</sub> concentrations.

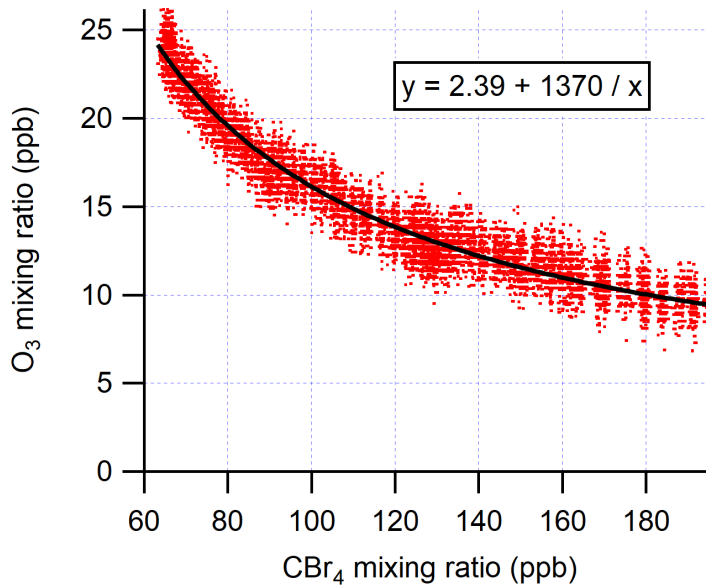

Figure S12. Evolution of O<sub>3</sub> and CBr<sub>4</sub> concentrations during a CBr<sub>4</sub> photolysis experiment with the Far UV lamp (Ushio B1) lasting 12 h.

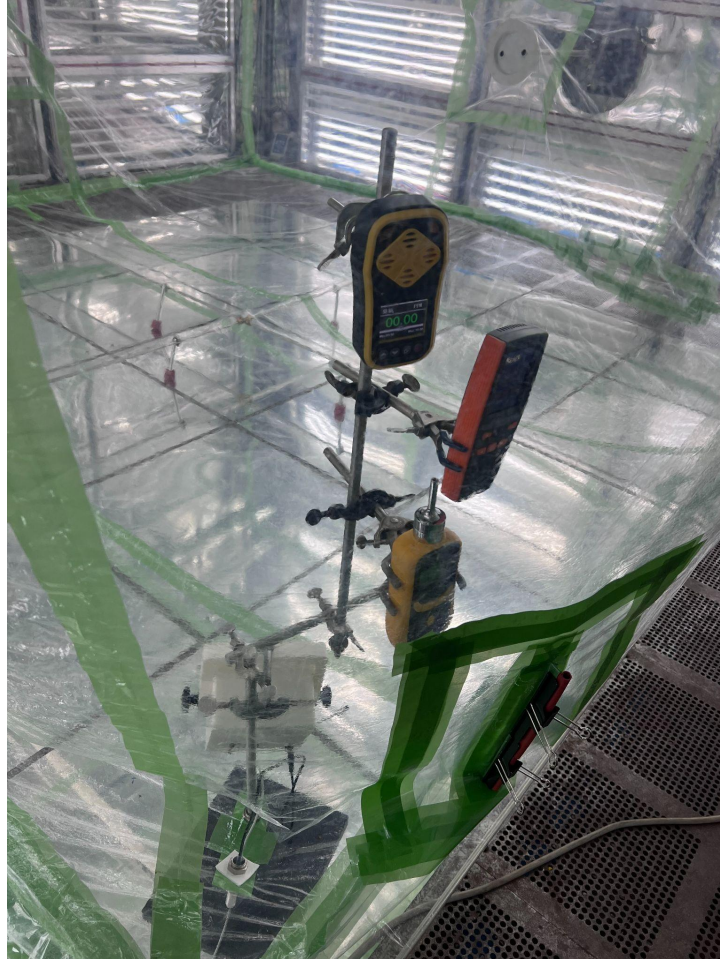

*Figure S13. Set up with three handheld O<sub>3</sub> monitors inside of the chamber. The Shandong Renke model is on top, the Shenzhen Dienmern model is in the middle, and the Shenzhen YuanTe model is on the bottom.*



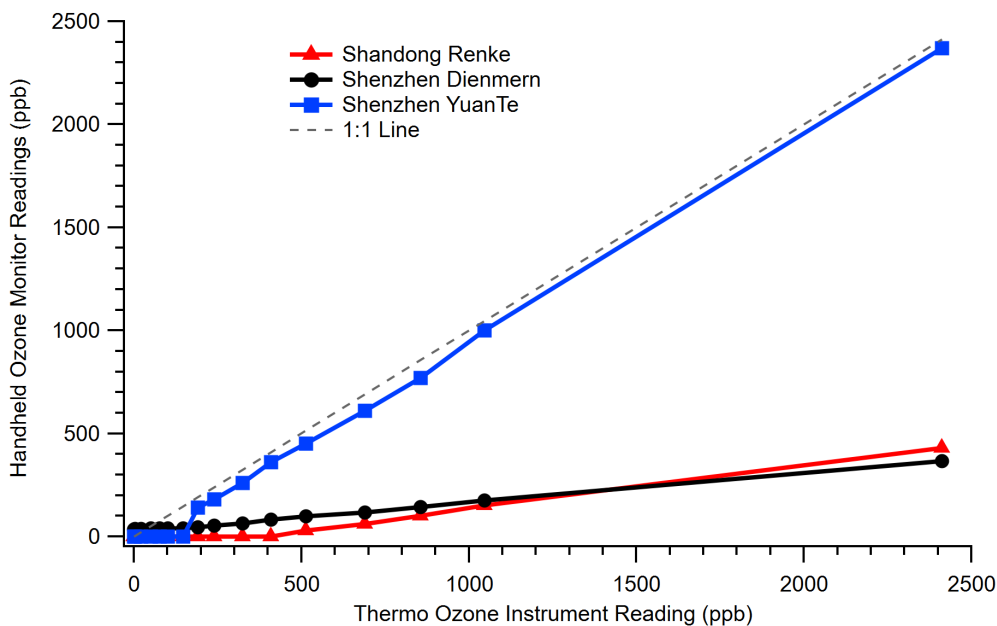

Figure S14. Comparison of the three portable  $O_3$  monitors against the research-grade Thermo  $O_3$  instrument.

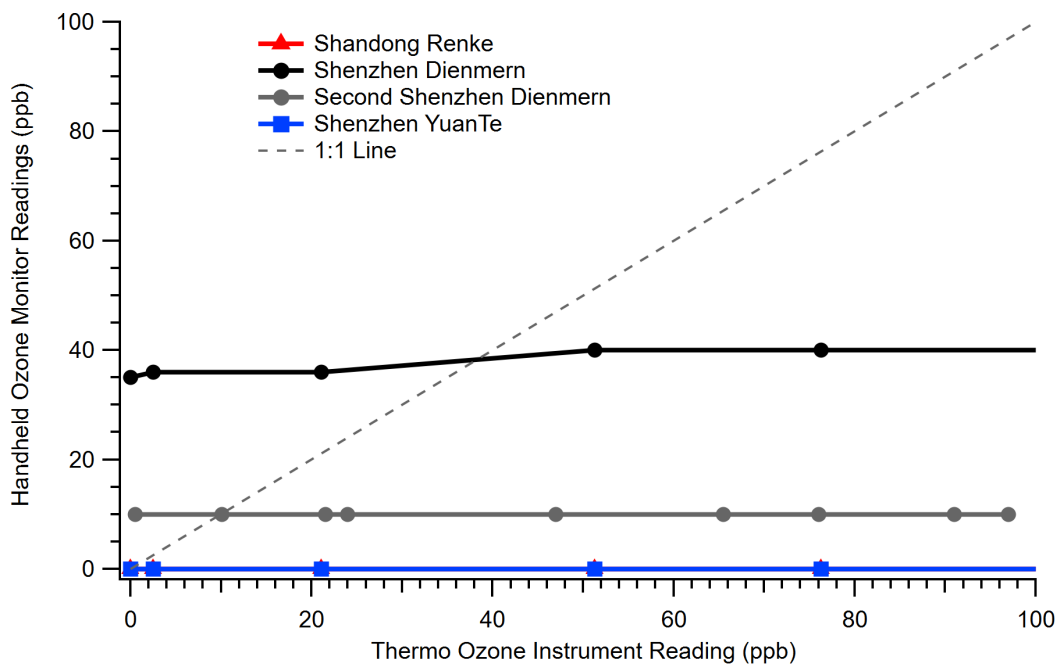

Figure S15. Comparison of the three portable  $O_3$  monitors against the research-grade Thermo  $O_3$  instrument, zoomed in the range of 0-100 ppb. A second and identical model Shenzhen Dienmern was also tested and shown in the gray line. This test was repeated once and none of the monitors showed appreciable differences, even the Shenzhen YuanTe still registered 0.00 ppm  $O_3$  (while being exposed to values in the range of this graph) after a zero calibration inside the clean  $O_3$ -free chamber.
